# Supplementary material
Source: Springer Nature journal article supplement (https://www.springermedizin.de/resource/supplementary/13023_2012_406_MOESM4_ESM.pdf/9642222)
Supplement: MOESM4 [file 9642222]

**A**Control  
p.1060N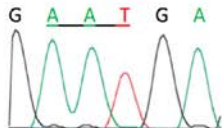Affected  
c.3179A>G  
p.N1060S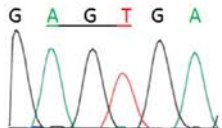Carrier  
c.3179A/G  
p.1060N/S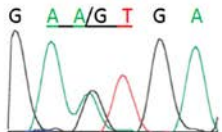**B**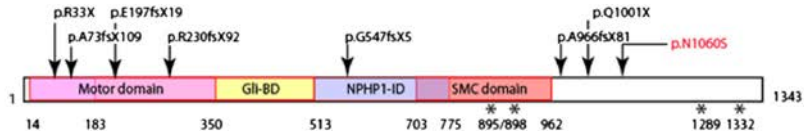**C**

|              |   |   |   |   |   |   |   |   |
|--------------|---|---|---|---|---|---|---|---|
| Human        | T | I | A | E | N | K | Y | E |
| Chimp        | T | I | A | E | N | K | Y | E |
| Gorilla      | T | I | A | E | N | K | Y | E |
| Orangutan    | T | I | A | E | N | K | Y | E |
| Rhesus       | T | I | A | E | N | K | Y | E |
| Baboon       | T | I | A | E | N | K | Y | E |
| Mariposet    | T | I | A | E | N | K | Y | E |
| Mouse_Tesur  | T | I | A | E | N | K | Y | E |
| Mouse        | T | I | A | E | N | K | Y | E |
| Dog          | T | I | A | E | N | K | Y | E |
| Elephant     | T | I | A | E | N | K | Y | E |
| Mallaby      | T | I | A | E | N | K | Y | E |
| Opossum      | T | I | A | E | N | K | Y | E |
| Platypus     | T | I | A | E | N | K | Y | E |
| Chicken      | T | I | A | E | N | K | Y | E |
| Zebra_finch  | T | I | A | E | N | K | Y | E |
| Lizard       | T | I | A | E | N | K | Y | E |
| X_tropicalis | T | I | A | E | N | K | Y | E |
| Tetraodon    | T | I | A | E | N | K | Y | E |
| Fugu         | T | I | A | E | N | K | Y | E |
| Stickleback  | T | I | A | E | N | K | Y | E |
| Medaka       | T | I | A | E | N | K | Y | E |
| Zebrafish    | T | I | A | E | N | K | Y | E |
